# Supplementary material
Source: PubMed Central journal article supplement (PMC2763077)

Fig. S1

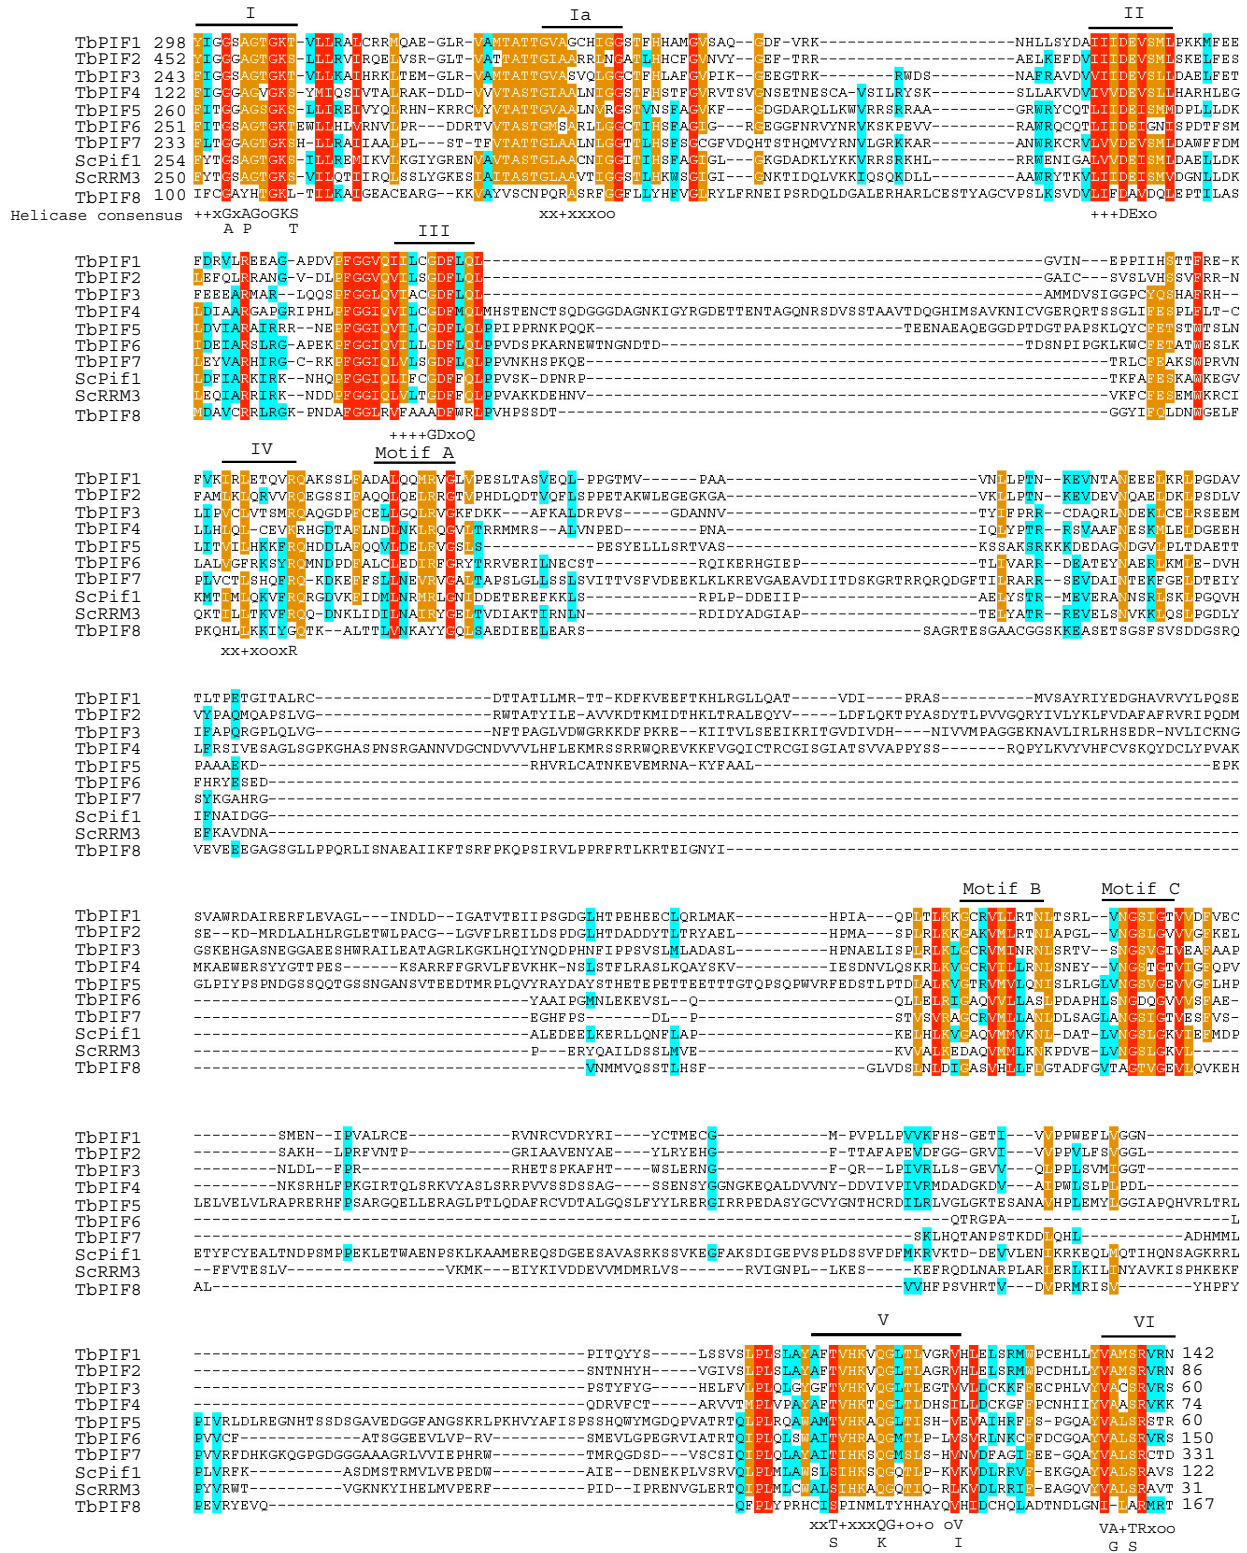

**Fig.S2**

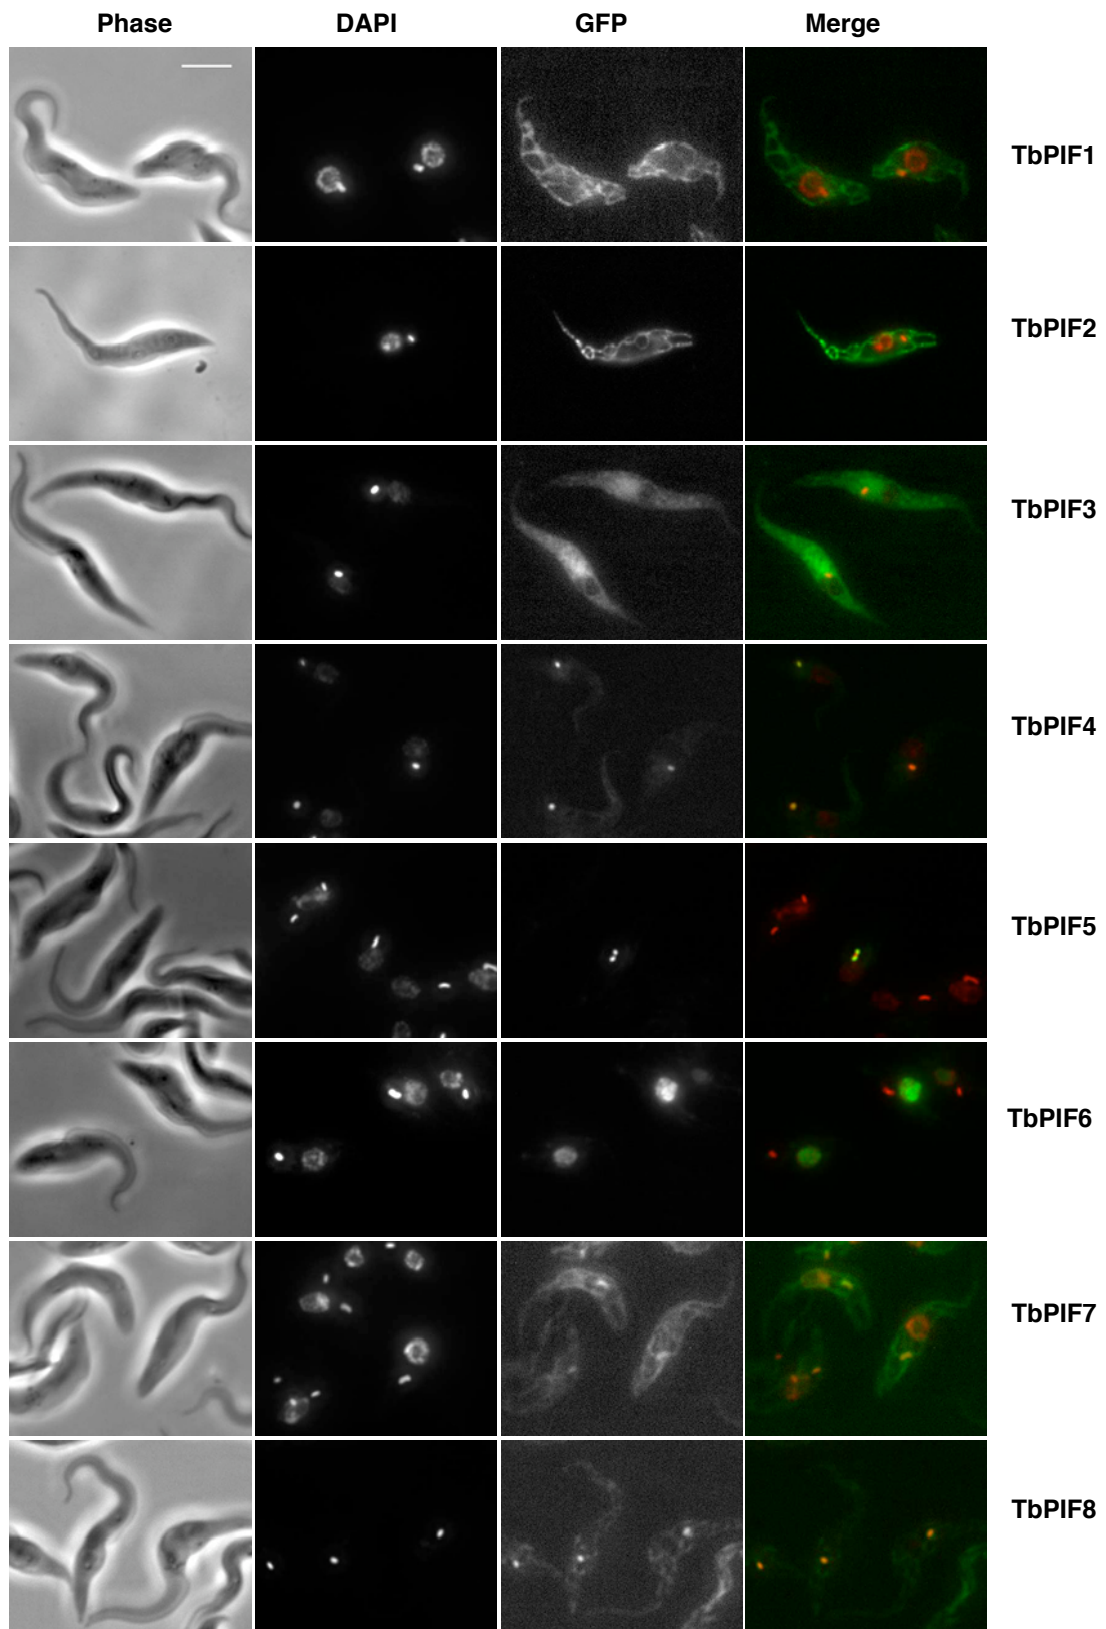

**Fig.S3**

**A**

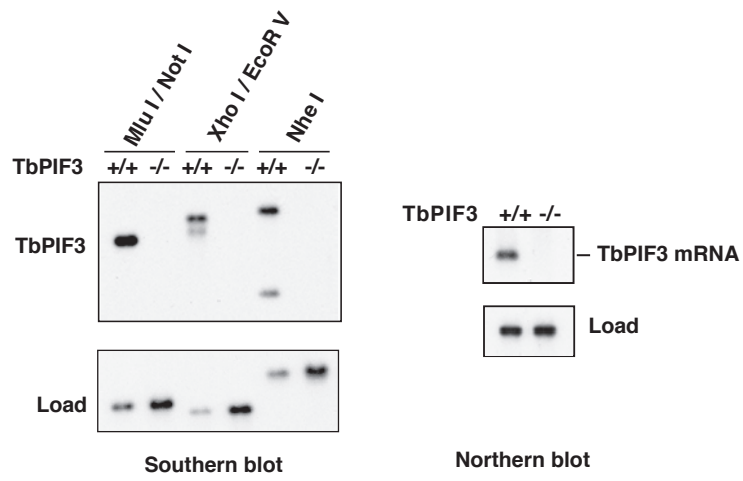

**B**

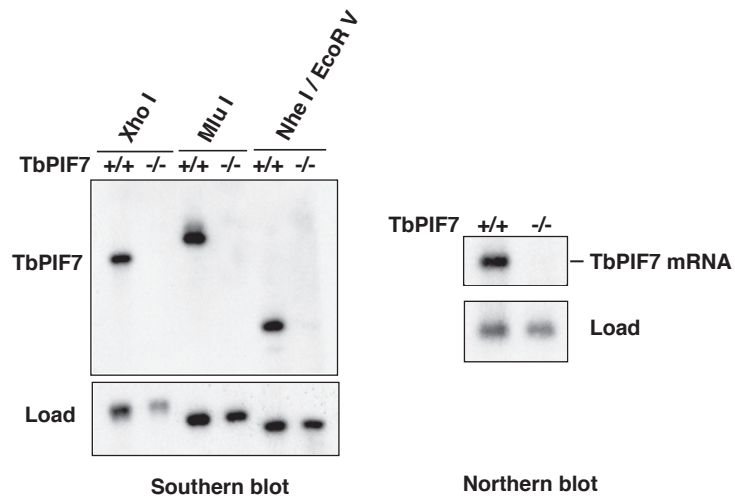

**Fig.S4**

**A**

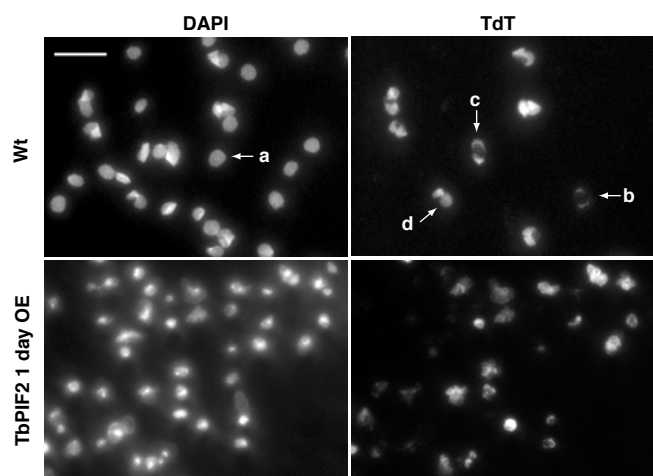

**B**

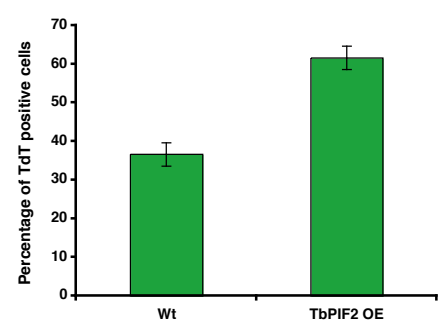

**C**

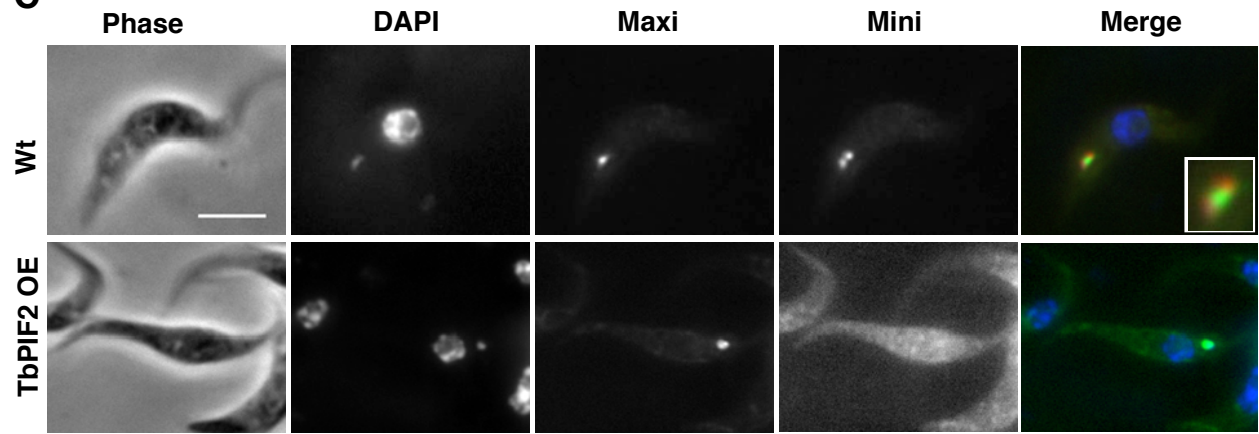

**D**

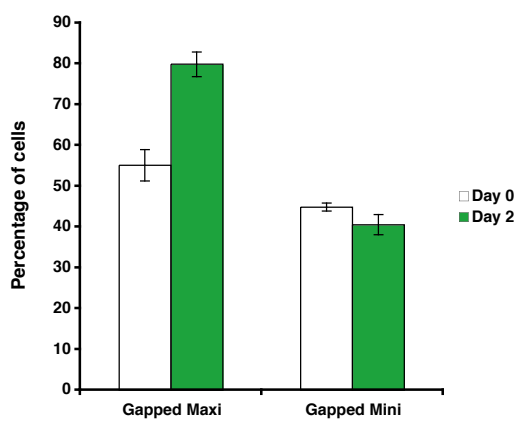

**Fig. S5**

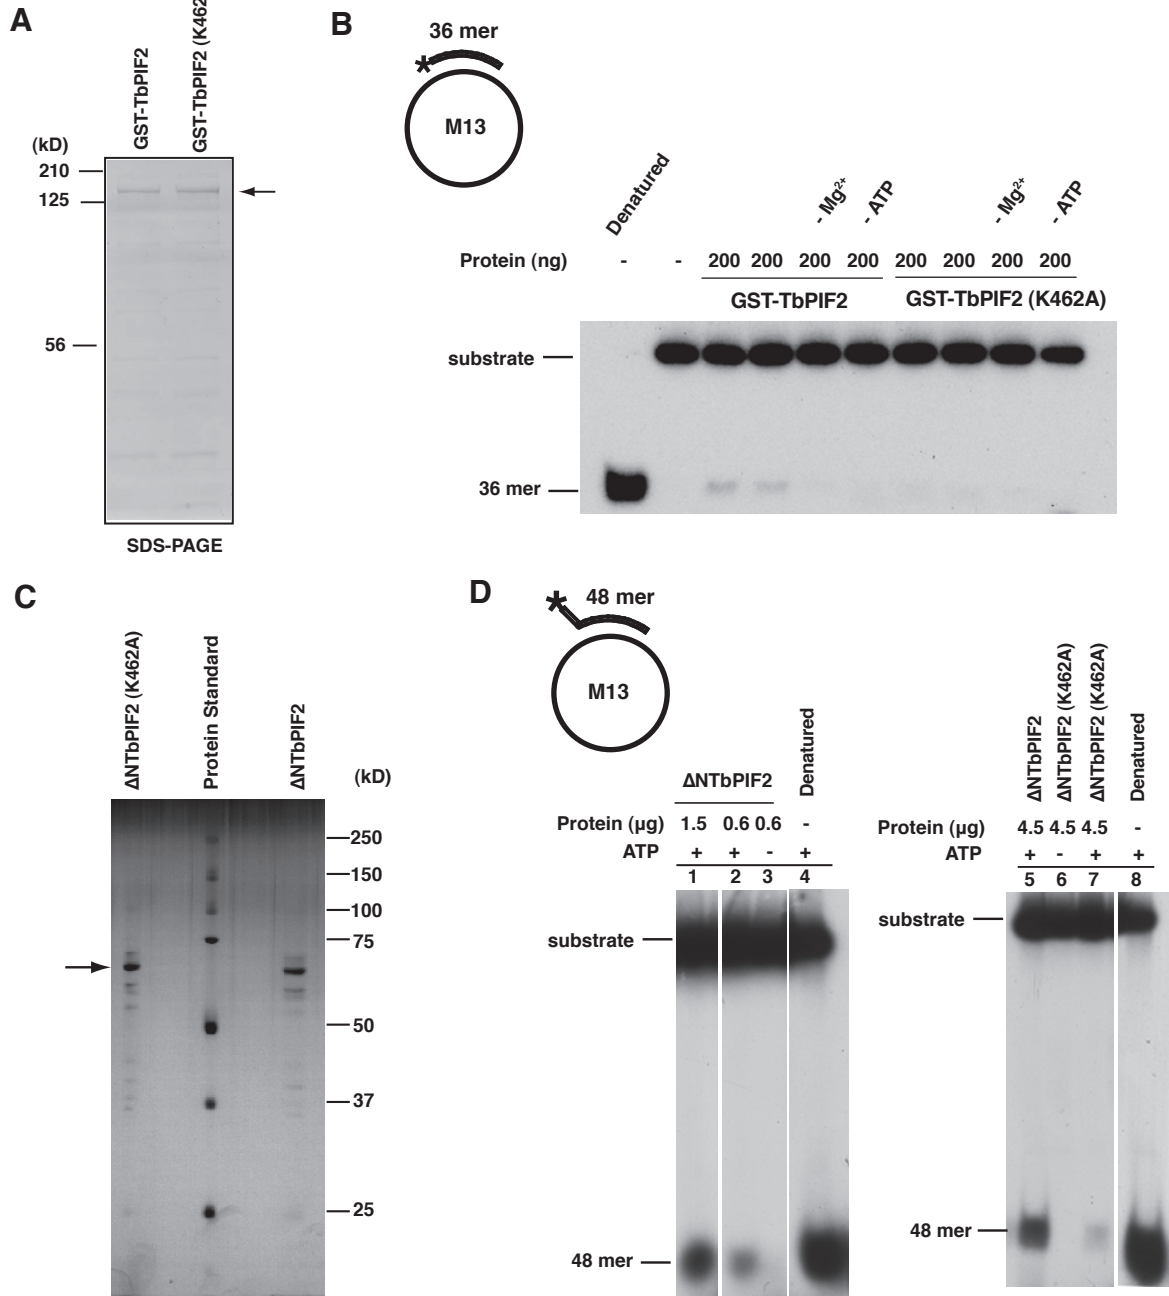

Supplement: NIHMS134003-supplement-01.pdf [file NIHMS134003-supplement-01.pdf]
